# Supplementary material for: Structural basis of the dominant inheritance of hypermethioninemia associated with the Arg264His mutation in the MAT1A gene
Source: PubMed Central journal article supplement (PMC7271947; doi:10.1107/s2059798320006002), 2020-05-29
Supplement: d-76-00594-sup1.pdf [file d-76-00594-sup1.pdf]

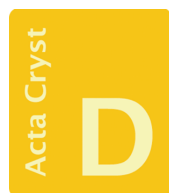

STRUCTURAL  
BIOLOGY

**Volume 76 (2020)**

**Supporting information for article:**

**Structural basis of the dominant inheritance of hypermethioninemia associated with the Arg264His mutation in the MAT1A gene**

**Jiraporn Panmanee, Svetlana V. Antonyuk and S. Samar Hasnain**

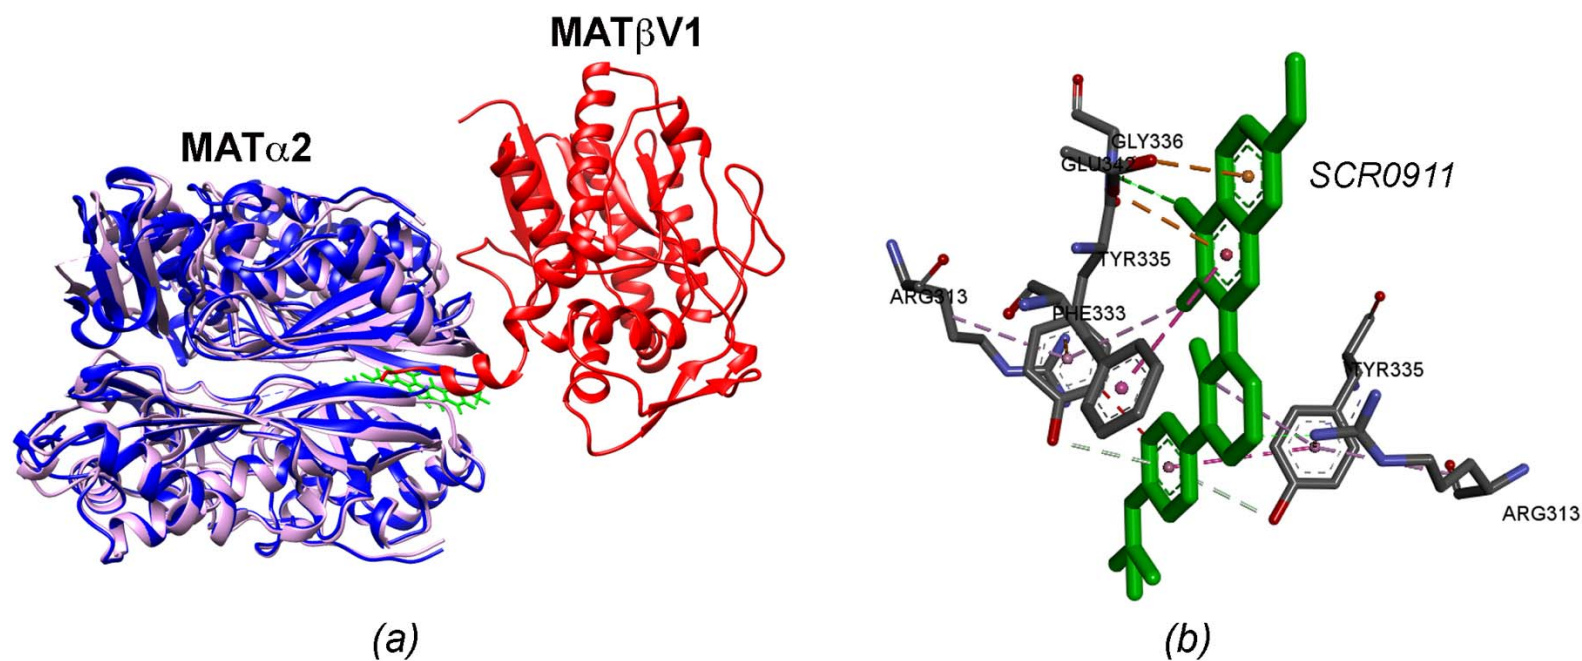

**Figure S1** Molecular docking of SCR0911 binding site of the R264H mutant by PachtDock. **(a)** The R264H mutant (grey) is aligned with the complex structure of MAT $\alpha$ 2 (blue) and MAT $\beta$  (red). SCR0911 is shown in a green stick. **(b)** SCR0911 and R264H interaction profiles obtained from PachtDock are shown. Protein ligand interactions are represented by green (H-bonds), pink ( $\pi$ - $\pi$  stacking) and orange colour (electrostatic interactions).

**Table S1** Dimer interface analysis showing residues involved in polar interactions.

| <b>wtMAT<math>\alpha</math>1</b> |                 |              |                 | <b>R264H</b>   |                 |              |                 |
|----------------------------------|-----------------|--------------|-----------------|----------------|-----------------|--------------|-----------------|
| Hydrogen bonds                   |                 |              |                 | Hydrogen bonds |                 |              |                 |
| #                                | Chain A         | Distance [Å] | Chain B         | #              | Chain A         | Distance [Å] | Chain B         |
| 1                                | B:SER 329[ OG ] | 3.39         | A:MET 19[ O ]   | 1              | B:THR 21[ N ]   | 3.24         | A:GLN 317[ OE1] |
| 2                                | B:SER 319[ OG ] | 3.03         | A:MET 19[ O ]   | 2              | B:THR 21[ OG1]  | 3.19         | A:SER 319[ OG ] |
| 3                                | B:ARG 264[ NH2] | 3.34         | A:GLU 57[ OE1]  | 3              | B:THR 21[ OG1]  | 3.17         | A:SER 329[ OG ] |
| 4                                | B:GLN 183[ NE2] | 2.94         | A:GLN 135[ O ]  | 4              | B:LYS 61[ NZ ]  | 3.66         | A:GLU 70[ OE2]  |
| 5                                | B:ARG 264[ NH2] | 3.17         | A:THR 262[ O ]  | 5              | B:LEU 137[ N ]  | 3.84         | A:GLU 23[ OE2]  |
| 6                                | B:MET 19[ N ]   | 2.99         | A:SER 329[ OG ] | 6              | B:LYS 181[ NZ ] | 2.95         | A:ASP 134[ OD1] |
| 7                                | B:GLN 190[ NE2] | 3.20         | A:GLU 342[ OE1] | 7              | B:LYS 181[ NZ ] | 2.75         | A:ASP 134[ OD2] |
| 8                                | B:MET 19[ O ]   | 3.36         | A:GLN 317[ NE2] | 8              | B:GLN 183[ NE2] | 2.76         | A:TYR 320[ O ]  |
| 9                                | B:MET 19[ O ]   | 3.27         | A:SER 319[ OG ] | 9              | B:ALA 259[ N ]  | 2.76         | A:GLU 70[ OE2]  |
| 10                               | B:MET 19[ O ]   | 3.49         | A:SER 329[ OG ] | 10             | B:HIS 264[ NE2] | 2.97         | A:GLU 57[ OE1]  |
| 11                               | B:GLU 57[ OE1]  | 3.19         | A:ALA 259[ N ]  | 11             | B:GLN 317[ NE2] | 2.96         | A:THR 21[ O ]   |
| 12                               | B:GLU 57[ OE2]  | 2.47         | A:ARG 264[ NH2] | 12             | B:SER 319[ OG ] | 3.15         | A:THR 21[ OG1]  |
| 13                               | B:GLN 135[ OE1] | 2.41         | A:THR 185[ OG1] | 13             | B:SER 329[ OG ] | 3.19         | A:THR 21[ OG1]  |
| 14                               | B:GLN 135[ OE1] | 3.26         | A:THR 21[ OG1]  | 14             | B:SER 331[ OG ] | 2.59         | A:MET 19[ O ]   |
| 15                               | B:THR 185[ OG1] | 2.79         | A:GLN 135[ NE2] | 15             | B:GLN 317[ OE1] | 3.32         | A:THR 21[ N ]   |
| 16                               | B:THR 262[ O ]  | 2.92         | A:ARG 264[ NH2] | 16             | B:GLU 70[ OE2]  | 3.88         | A:LYS 61[ NZ ]  |
| 17                               | B:SER 329[ OG ] | 2.95         | A:MET 19[ N ]   | 17             | B:GLU 111[ OE1] | 3.55         | A:LYS 61[ NZ ]  |
| 18                               | B:GLU 342[ OE1] | 3.06         | A:GLN 190[ NE2] | 18             | B:ASP 134[ OD1] | 3.21         | A:LYS 181[ NZ ] |
|                                  |                 |              |                 | 19             | B:ASP 134[ OD2] | 3.12         | A:LYS 181[ NZ ] |
|                                  |                 |              |                 | 20             | B:TYR 320[ O ]  | 2.81         | A:GLN 183[ NE2] |
|                                  |                 |              |                 | 21             | B:GLU 342[ OE1] | 3.77         | A:GLN 190[ NE2] |
|                                  |                 |              |                 | 22             | B:GLU 70[ OE2]  | 2.85         | A:ALA 259[ N ]  |
|                                  |                 |              |                 | 23             | B:GLU 57[ OE1]  | 2.90         | A:HIS 264[ NE2] |

|   |                 |      |                 | 24 | B:THR 21[ O ]   | 2.84         | A:GLN 317[ NE2] |
|---|-----------------|------|-----------------|----|-----------------|--------------|-----------------|
|   |                 |      |                 | 25 | B:MET 19[ O ]   | 2.64         | A:SER 331[ OG ] |
|   | Salt-Bridges    |      |                 |    | Salt-Bridges    |              |                 |
| # | Chain A         |      | Chain B         | #  | Chain A         | Distance [Å] | Chain B         |
| 1 | B:ARG 264[ NH1] | 3.87 | A:GLU 57[ OE1]  | 1  | B:LYS 61[ NZ ]  | 3.66         | A:GLU 70[ OE2]  |
| 2 | B:ARG 264[ NH2] | 3.34 | A:GLU 57[ OE1]  | 2  | B:LYS 181[ NZ ] | 2.95         | A:ASP 134[ OD1] |
| 3 | B:GLU 57[ OE2]  | 2.68 | A:ARG 264[ NH1] | 3  | B:LYS 181[ NZ ] | 2.75         | A:ASP 134[ OD2] |
| 4 | B:GLU 57[ OE2]  | 2.47 | A:ARG 264[ NH2] | 4  | B:HIS 264[ NE2] | 2.97         | A:GLU 57[ OE1]  |
|   |                 |      |                 | 5  | B:GLU 70[ OE2]  | 3.88         | A:LYS 61[ NZ ]  |
